# Supplementary material
Source: PubMed Central journal article supplement (PMC4568715)
Supplement: pnas.1506533112.sd01.pdf [file pnas.1506533112.sd01.pdf]

**Dataset S1.** Annotation of *Nitrospira moscoviensis* and *Nitrospira lenta* genes discussed in this study.

| Identifier            | Gene | Product                                                  | EC number | Best hit in SwissProt database <sup>a</sup>                                                                 | Best hit in Trembl database <sup>b</sup>                                |
|-----------------------|------|----------------------------------------------------------|-----------|-------------------------------------------------------------------------------------------------------------|-------------------------------------------------------------------------|
| <i>N.moscoviensis</i> |      |                                                          |           |                                                                                                             |                                                                         |
| NITMOv2_1249          |      | conserved protein of unknown function                    |           | <i>Escherichia coli</i> K12 (P37177; 748/420; 0.3; 28%)                                                     | <i>Nitrospira defluvii</i> (D8PCZ5; 419/420; 0.98; 86%)                 |
| NITMOv2_1250          |      | protein of unknown function                              |           | no hit                                                                                                      | no hit                                                                  |
| NITMOv2_1251          |      | putative urea ABC transporter, urea binding protein UrtA |           | <i>Pseudomonas aeruginosa</i> ATCC 15692 (P27017; 385/449; 0.86; 30%)                                       | <i>Cytophaga hutchinsonii</i> ATCC 33406 (Q11VN9; 445/449; 0.9; 68%)    |
| NITMOv2_1252          |      | exported protein of unknown function                     |           | no hit                                                                                                      | no hit                                                                  |
| NITMOv2_1253          | ureA | Urease gamma subunit                                     | 3.5.1.5   | <i>Azoarcus sp.</i> BH72 (A1KBB7; 100/100; 0.99; 75%)                                                       | <i>Caldilinea aerophila</i> DSM 14535 (I0HZB9; 100/100; 1; 75%)         |
| NITMOv2_1254          |      | protein of unknown function                              |           | no hit                                                                                                      | no hit                                                                  |
| NITMOv2_1255          | ureB | Urease subunit beta (modular protein)                    | 3.5.1.5   | <i>Natronomonas pharaonis</i> ATCC 35678 ( <i>Halobacterium pharaonis</i> ) (Q3IRZ6; 132/164; 0.73; 60%)    | <i>Ethanoligenens harbinense</i> DSM 18485 (E6U7P1; 124/164; 0.71; 62%) |
| NITMOv2_1256          |      | protein of unknown function                              |           | no hit                                                                                                      | no hit                                                                  |
| NITMOv2_1257          |      | protein of unknown function                              |           | no hit                                                                                                      | no hit                                                                  |
| NITMOv2_1258          |      | exported protein of unknown function                     |           | no hit                                                                                                      | no hit                                                                  |
| NITMOv2_1259          |      | exported protein of unknown function                     |           | no hit                                                                                                      | no hit                                                                  |
| NITMOv2_1260          | ureC | Urease alpha subunit                                     | 3.5.1.5   | <i>Synechococcus sp.</i> (strain JA-2-3B'a(2-13)) (Q2JQ88; 572/575; 1; 73%)                                 | <i>Moorea producens</i> 3L (568/575; 0.99; 73%)                         |
| NITMOv2_1261          |      | putative urease accessory protein UreF                   |           | <i>Actinobacillus pleuropneumoniae</i> serotype 5b (strain L20) (A3N2R1; 227/228; 0.97; 28%)                | <i>Mucilaginibacter paludis</i> DSM 18603 (H1Y7Y1; 228/ 228; 1; 30%)    |
| NITMOv2_1262          | ureG | Urease accessory protein UreG                            |           | <i>Alkalilimnicola ehrlichii</i> ATCC BAA-1101 (Q0AC95; 211/223; 0.84; 75%)                                 |                                                                         |
| NITMOv2_1263          |      | putative urease accessory protein UreD                   |           | <i>Cupriavidus pinatubonensis</i> JMP 134 ( <i>Ralstonia eutropha</i> JMP 134) (Q473R3; 289/293; 0.91; 31%) | <i>Streptomyces ghanaensis</i> ATCC 14672 (D5ZR9; 292/293; 1; 33%)      |
| NITMOv2_1264          |      | conserved protein of unknown function                    |           | <i>Rattus norvegicus</i> (Rat) (O09175; 650/273; 0.2; 27%)                                                  | <i>Nitrospira defluvii</i> (D8PCZ8 ; 303/273; 0.9; 37%)                 |
| NITMOv2_1265          | nadE | Glutamine-dependent NAD(+) synthase                      | 6.3.5.1   | <i>Thermotoga maritima</i> ATCC 43589                                                                       | <i>Nitrospira defluvii</i> (D8PCZ9;                                     |

|                     |      |                                                                            |           |                                                                                                                            |                                                                            |
|---------------------|------|----------------------------------------------------------------------------|-----------|----------------------------------------------------------------------------------------------------------------------------|----------------------------------------------------------------------------|
|                     |      |                                                                            |           | (Q9X0Y0; 576/590; 1; 48%)                                                                                                  | 589/590; 1; 74%)                                                           |
| <b>NITMOv2_1266</b> |      | conserved protein of unknown function                                      |           | no hit                                                                                                                     | <i>Nitrospira defluvii</i> (D8PD00; 292/322; 0.93; 71%)                    |
| <b>NITMOv2_1267</b> | amtB | Ammonium transporter                                                       |           | <i>Bacillus subtilis</i> 168 (Q07429; 404/441; 0.911; 54%)                                                                 | <i>Nitrospira defluvii</i> (D8PD01; 442/441; 0.97; 80%)                    |
| <b>NITMOv2_1268</b> | glnB | Nitrogen regulatory protein PII                                            |           | <i>Aquifex aeolicus</i> VF5 (O66513 ; 112/112; 1; 68%)                                                                     | <i>Nitrospira defluvii</i> (D8PD02 ; 112/112; 1; 90%)                      |
| <b>NITMOv2_1269</b> |      | putative (Protein-PII) uridylyltransferase GlnD                            | 2.7.7.59  | <i>Ochrobactrum anthropi</i> ATCC 49188 (A6WV84; 934/891; 0.94; 32%)                                                       | <i>Nitrospira defluvii</i> (D8PD03; 894/891; 0.99; 71%)                    |
| <b>NITMOv2_1270</b> | glnA | Glutamine synthetase                                                       | 6.3.1.2   | <i>Synechocystis sp.</i> PCC 6803 (P77961; 473/469; 0.99; 63%)                                                             | <i>Nitrospira defluvii</i> (D8PD04; 469/469; 1; 93%)                       |
| <b>NITMOv2_1271</b> |      | putative nitrate ABC transporter, nitrate binding protein NrtA             |           | <i>Synechocystis sp.</i> PCC 6803 (P73450; 670/458; 0.56; 34%)                                                             | <i>Desulfomonile tiedjei</i> ATCC 49306 (I4C053; 464/458; 0.92; 0.93; 64%) |
| <b>NITMOv2_1272</b> | nrtB | Nitrate ABC transporter, integral membrane subunit (modular protein)       |           | <i>Synechocystis sp.</i> PCC 6803 (P73451 ; 275/325; 0.68; 37%)                                                            | <i>Desulfomonile tiedjei</i> ATCC 49306 (I4C052; 257/325; 0.72; 59%)       |
| <b>NITMOv2_1273</b> |      | ABC transporter, ATP-binding protein NrtD                                  |           | <i>Synechococcus elongatus</i> PCC 7942 ( <i>Anacystis nidulans</i> R2) (P38046; 274/280; 0.92; 51%)                       | <i>Desulfomonile tiedjei</i> ATCC 49306 (I4C051; 276/280; 0.9; 66%)        |
| <b>NITMOv2_1274</b> | cynS | Cyanate hydratase                                                          | 4.2.1.104 | <i>Dechloromonas aromatica</i> RCB (Q47G40; 147/146; 1; 39%)                                                               | <i>Nitrospira defluvii</i> (D8PD06; 146/146; 1; 79%)                       |
| <b>NITMOv2_1275</b> | amtB | Ammonium transporter                                                       |           | <i>Bacillus subtilis</i> 168 (Q07429; 404/462; 0.85; 55%)                                                                  | <i>Nitrospira defluvii</i> (D8PD01; 442/462; 0.94; 72%)                    |
| <b>NITMOv2_1276</b> |      | protein of unknown function                                                |           | no hit                                                                                                                     | no hit                                                                     |
| <b>NITMOv2_1277</b> |      | conserved protein of unknown function                                      |           | no hit                                                                                                                     | <i>Nitrospira defluvii</i> (D8PD07; 64/76; 0.78; 46%)                      |
| <b>NITMOv2_1278</b> | amtB | Ammonium transporter                                                       |           | <i>Bacillus subtilis</i> 168 (Q07429; 404/387; 0.98; 44%)                                                                  | <i>Ammonifex degensii</i> DSM 10501 (C9R9J0; 434/387; 0.92; 47%)           |
| <b>NITMOv2_1279</b> |      | putative quinol-cytochrome <i>c</i> reductase, iron sulfur subunit         | 1.10.2.2  | <i>Chlorobaculum thiosulfatophilum</i> ( <i>Chlorobium limicola f.sp. thiosulfatophilum</i> ) (Q46136; 181/148; 0.77; 31%) | <i>Caldithrix abyssi</i> DSM 13497 (H1XYE5; 154/148; 0.97; 32%)            |
| <b>NITMOv2_1280</b> |      | putative quinol-cytochrome <i>c</i> reductase, cytochrome <i>b</i> subunit | 1.10.2.2  | <i>Spirogyra maxima</i> (Green alga) (Q71KP4; 215/348; 0.56; 42%)                                                          | <i>Caldithrix abyssi</i> DSM 13497 (H1XYE4; 348/348; 0.91; 39%)            |

|                     |                                                |          |                                                                                                   |                                                                           |
|---------------------|------------------------------------------------|----------|---------------------------------------------------------------------------------------------------|---------------------------------------------------------------------------|
| <b>NITMOv2_1281</b> | putative octaheme cytochrome <i>c</i>          |          | <i>Nitrosomonas europaea</i> ATCC 19718 (Q50925; 570/474; 0.65; 25%)                              | <i>Desulfomonile tiedjei</i> ATCC 49306 (I4CB31; 453/474; 0.89; 49%)      |
| <b>NITMOv2_1282</b> | conserved protein of unknown function          |          | no hit                                                                                            | <i>Mesorhizobium opportunistum</i> LMG 24607 (F7Y331; 156/176; 0.86; 80%) |
| <b>NITMOv2_1283</b> | conserved protein of unknown function          |          | <i>Methanopyrus kandleri</i> AV19 (P50100; 196/283; 0.42; 32%)                                    | <i>Nitrospira defluvii</i> (D8PD09; 258/283; 0.89; 65%)                   |
| <b>NITMOv2_0254</b> | putative Nitrite oxidoreductase, beta subunit  | 1.7.99.4 | <i>Rhodovulum sulfidophilum</i> ( <i>Rhodobacter sulfidophilus</i> ) (Q8GPG3; 325/429; 0.82; 36%) | <i>Nitrospira defluvii</i> (D8PI40; 429/429; 1; 97%)                      |
| <b>NITMOv2_0255</b> | putative Nitrite oxidoreductase, alpha subunit | 1.7.99.4 | <i>Thauera selenatis</i> (Q9S1H0; 918/1145; 0.86; 22%)                                            | <i>Nitrospira defluvii</i> (D8PI59; 1147/1145; 1; 88%)                    |
| <b>NITMOv2_4027</b> | putative Nitrite oxidoreductase, beta subunit  | 1.7.99.4 | <i>Rhodovulum sulfidophilum</i> ( <i>Rhodobacter sulfidophilus</i> ) (Q8GPG3; 325/429; 0.82; 36%) | <i>Nitrospira defluvii</i> (D8PI40; 429/429; 1; 97%)                      |
| <b>NITMOv2_4028</b> | putative Nitrite oxidoreductase, alpha subunit | 1.7.99.4 | <i>Thauera selenatis</i> (Q9S1H0; 918/1145; 0.86; 22%)                                            | <i>Nitrospira defluvii</i> (D8PI59; 1147/1145; 1; 88%)                    |
| <b>NITMOv2_4030</b> | - Sigma54 dependent transcriptional regulator  |          | <i>Escherichia coli</i> K12 (Q06065; 461/473; 0.72; 45%)                                          | <i>Nitrospira defluvii</i> (D8PI58; 473/473; 1; 69%)                      |
| <b>NITMOv2_4032</b> | putative Nitrite oxidoreductase, beta subunit  | 1.7.99.4 | <i>Rhodovulum sulfidophilum</i> ( <i>Rhodobacter sulfidophilus</i> ) (Q8GPG3; 325/429; 0.82; 36%) | <i>Nitrospira defluvii</i> (D8PI40; 429/429; 1; 97%)                      |
| <b>NITMOv2_4033</b> | putative Nitrite oxidoreductase, alpha subunit | 1.7.99.4 | <i>Thauera selenatis</i> (Q9S1H0; 918/1145; 0.86; 23%)                                            | <i>Nitrospira defluvii</i> (D8PI59; 1147/1145; 1; 87%)                    |
| <b>NITMOv2_4035</b> | - Sigma54 dependent transcriptional regulator  |          | <i>Escherichia coli</i> K12 (P14375; 441/488; 0.92; 37%)                                          | <i>Nitrospira defluvii</i> (D8PI58; 473/488; 0.95; 47%)                   |
| <b>NITMOv2_4533</b> | putative Nitrite oxidoreductase, beta subunit  | 1.7.99.4 | <i>Rhodovulum sulfidophilum</i> ( <i>Rhodobacter sulfidophilus</i> ) (Q8GPG3; 325/429; 0.82; 36%) | <i>Nitrospira defluvii</i> (D8PI40; 429/429; 1; 92%)                      |
| <b>NITMOv2_4534</b> | putative Nitrite oxidoreductase, alpha subunit | 1.7.99.4 | <i>Thauera selenatis</i> (Q9S1H0; 918/1145; 0.66; 23%)                                            | <i>Nitrospira defluvii</i> (D8PI59; 1147/1145; 1; 87%)                    |
| <b>NITMOv2_4536</b> | Sigma54 dependent transcriptional regulator    |          | <i>Klebsiella oxytoca</i> (Q9APD9; 443/473; 0.87; 40%)                                            | <i>Nitrospira defluvii</i> (D8PI58; 473/473; 1; 64%)                      |
| <b>NITMOv2_4537</b> | putative Nitrite oxidoreductase, beta subunit  | 1.7.99.4 | <i>Rhodovulum sulfidophilum</i> ( <i>Rhodobacter sulfidophilus</i> ) (Q8GPG3; 325/429; 0.82; 36%) | <i>Nitrospira defluvii</i> (D8PI40; 429/429; 1; 97%)                      |

|                     |      |                                                                                  |          |                                                                                                                  |                                                         |
|---------------------|------|----------------------------------------------------------------------------------|----------|------------------------------------------------------------------------------------------------------------------|---------------------------------------------------------|
|                     |      |                                                                                  |          | 36%)                                                                                                             |                                                         |
| <b>NITMOv2_4538</b> |      | putative Nitrite oxidoreductase, alpha subunit                                   | 1.7.99.4 | <i>Thauera selenatis</i> (Q9S1H0 ; 918/1145; 0.86; 22%)                                                          | <i>Nitrospira defluvii</i> (D8PI59; 1147/1145; 1; 88%)  |
| <b>NITMOv2_4539</b> |      | Sigma54 dependent transcriptional regulator                                      |          | <i>Escherichia coli</i> O157:H7 (Q8X613; 441/472; 0.88; 40%)                                                     | <i>Nitrospira defluvii</i> (D8PI58; 473/472; 1; 73%)    |
| <b>NITMOv2_4696</b> | katA | Catalase (hydroperoxidase II)                                                    | 1.11.1.6 | <i>Vibrio fischeri</i> ATCC 700601 (O68146; 482/486; 0.98; 80%)                                                  | <i>Azoarcus sp.</i> KH32C (H0PX65; 485/486; 0.98; 82%)  |
| <b>NITMOv2_0085</b> | katA | Catalase                                                                         | 1.11.1.6 | <i>Vibrio fischeri</i> ATCC 700601 (O68146; 482/486; 0.98; 80%)                                                  | <i>Azoarcus sp.</i> KH32C (H0PX65; 485/486; 0.98; 82%)  |
| <b>NITMOv2_2805</b> | sod  | Superoxide dismutase (Fe)                                                        | 1.15.1.1 | <i>Ralstonia metallidurans</i> CH34 (P17550; 197/211; 0.89; 35%)                                                 | mine drainage metagenome (E6PDX0 ; 195/211; 0.92; 54%)  |
| <b>NITMOv2_3821</b> | focA | Formate transporter                                                              |          | <i>Escherichia coli</i> K12 (P0AC23; 285/298; 0.93; 43%)                                                         | <i>Nitrospira defluvii</i> (D8PEK0; 280/298; 0.9; 72%)  |
| <b>NITMOv2_3822</b> | fdsA | Formate dehydrogenase, alpha subunit                                             | 1.2.1.2  | <i>Methanocaldococcus jannaschii</i> ATCC 43067 ( <i>Methanococcus jannaschii</i> ) (P61159; 673/916; 0.74; 40%) | <i>Nitrospira defluvii</i> (D8PEJ9; 908/916; 0.97; 69%) |
| <b>NITMOv2_3823</b> | fdsB | Formate dehydrogenase, beta subunit                                              | 1.2.1.2  | <i>Desulfovibrio fructosivorans</i> (Q46507; 490/528; 0.77; 44%)                                                 | <i>Nitrospira defluvii</i> (D8PEJ8; 498/528; 0.93; 69%) |
| <b>NITMOv2_3825</b> | fdsG | Formate dehydrogenase, gamma subunit                                             | 1.2.1.2  | <i>Pseudomonas aeruginosa</i> ATCC 15692 (Q9I0J8; 166/156; 0.84; 40%)                                            | <i>Nitrospira defluvii</i> (D8PEJ7; 149/156; 0.91; 50%) |
| <b>NITMOv2_0740</b> |      | putative Nitrite oxidoreductase, membrane subunit                                | 1.7.99.4 | <i>Thauera selenatis</i> (Q9S1G7; 239/279; 0.87; 29%)                                                            | <i>Nitrospira defluvii</i> (D8PBQ9; 275/279; 0.88; 69%) |
| <b>NITMOv2_3617</b> |      | putative Nitrite oxidoreductase, membrane subunit                                | 1.7.99.4 | <i>Thauera selenatis</i> (Q9S1G7; 239/277; 1; 26%)                                                               | <i>Nitrospira defluvii</i> (D8PI74; 280/277; 1; 80%)    |
| <b>NITMOv2_3624</b> |      | putative Nitrite oxidoreductase, membrane subunit                                | 1.7.99.4 | <i>Ideonella dechloratans</i> (P60000; 239/316; 0.46; 28%)                                                       | <i>Nitrospira defluvii</i> (D8PI81; 317/316; 1; 89%)    |
| <b>NITMOv2_3640</b> |      | putative Nitrite oxidoreductase, cytochrome <i>c</i> containing membrane subunit |          | <i>Thauera selenatis</i> (Q9S1G7; 239/591; 0.42; 22%)                                                            | <i>Nitrospira defluvii</i> (D8PI95; 594/591; 1; 77%)    |
| <b>NITMOv2_4208</b> |      | putative Nitrite oxidoreductase, membrane subunit                                | 1.7.99.4 | <i>Thauera selenatis</i> (Q9S1G7; 239/262; 1; 27%)                                                               | <i>Nitrospira defluvii</i> (D8PI74; 280/262; 0.93; 64%) |

| Identifier<br><i>N.lenta</i> | Gene        | Product                                         | EC<br>number | Best hit in SwissProt database <sup>a</sup>                                                         | Best hit in Trembl database <sup>b</sup>                         |
|------------------------------|-------------|-------------------------------------------------|--------------|-----------------------------------------------------------------------------------------------------|------------------------------------------------------------------|
| NITLEN_v1_11<br>0011         |             | conserved protein of unknown function           |              | <i>Methanopyrus kandleri</i> AV19 (P50100; 196/256; 0.40; 36%)                                      | <i>Nitrospira defluvii</i> (D8PD09; 258/256; 0.98; 63%)          |
| NITLEN_v1_11<br>0012         | <i>nirA</i> | Ferredoxin-nitrite reductase                    | 1.7.7.1      | <i>Synechococcus elongatus</i> PCC 794 ( <i>Anacystis nidulans</i> R2) (P39661; 512/520; 0.95; 44%) | <i>Nitrospira defluvii</i> (D8PD08; 531/520; 0.98; 73%)          |
| NITLEN_v1_11<br>0013         |             | protein of unknown function                     |              | no hit                                                                                              | no hit                                                           |
| NITLEN_v1_11<br>0014         | <i>cynS</i> | Cyanate hydratase                               | 4.2.1.104    | <i>Photorhabdus luminescens</i> TT01 subsp. laumondii (Q7NA33; 156/146; 0.90; 43%)                  | <i>Nitrospira defluvii</i> (D8PD06; 146/146; 1; 81%)             |
| NITLEN_v1_11<br>0015         | <i>nirC</i> | Nitrite transporter                             |              | <i>Escherichia coli</i> K12 (P0AC26; 268/276; 0.88; 47%)                                            | <i>Nitrospira defluvii</i> (D8PD05; 276/276; 1; 76%)             |
| NITLEN_v1_11<br>0016         | <i>glnA</i> | Glutamine synthetase                            | 6.3.1.2      | <i>Nostoc</i> sp. PCC 7120/UTEX 2576 (P00964; 474/469; 0.99; 63%)                                   | <i>Nitrospira defluvii</i> (D8PD04; 469/469; 1; 93%)             |
| NITLEN_v1_11<br>0017         |             | putative (Protein-PII) uridylyltransferase GlnD | 2.7.7.59     | <i>Azospirillum brasilense</i> (Q8RQD1; 933/894; 0.88; 34%)                                         | <i>Nitrospira defluvii</i> (D8PD03; 894/894; 1; 71%)             |
| NITLEN_v1_11<br>0018         | <i>glnB</i> | Nitrogen regulatory protein P-II                |              | <i>Aquifex aeolicus</i> VF5 (O66513; 112/112; 1; 68%)                                               | <i>Nitrospira defluvii</i> (D8PD02; 112/112; 1; 92%)             |
| NITLEN_v1_11<br>0019         | <i>amtB</i> | Ammonium transporter                            |              | <i>Bacillus subtilis</i> 168 (Q07429; 404/444; 0.91; 55%)                                           | <i>Nitrospira defluvii</i> (D8PD01; 442/444; 1; 74%)             |
| NITLEN_v1_11<br>0020         | <i>amtB</i> | Ammonium transporter                            |              | <i>Bacillus subtilis</i> 168 (Q07429; 404/462; 0.87; 55)                                            | <i>Ca. Methylomirabilis oxyfera</i> (D5MG60; 458/462; 0.99; 68%) |
| NITLEN_v1_11<br>0021         |             | conserved exported protein of unknown function  |              | <i>Neurospora crassa</i> ATCC 24698 (P28349; 1090/449; 0.12; 29%)                                   | <i>Ca. Methylomirabilis oxyfera</i> (D5MG73; 458/449; 0.95; 31%) |
| NITLEN_v1_11<br>0022         |             | protein of unknown function                     |              | no hit                                                                                              | <i>Pandoraea</i> sp. SD6-2 (R7WZJ2; 806/116; 0.07; 35%)          |
| NITLEN_v1_11<br>0023         |             | protein of unknown function                     |              | <i>Drosophila pseudoobscura</i> (P12348; 1271/657; 0.03; 40%)                                       | no hit                                                           |
| NITLEN_v1_11<br>0024         |             | exported protein of unknown function            |              | <i>Saccharomyces cerevisiae</i> ATCC 204508/S288c (P41809; 1802/327; 01; 27%)                       | <i>Nitrospira defluvii</i> (D8PEI4; 348/327; 1.01; 28%)          |
| NITLEN_v1_11                 | <i>nadE</i> | Glutamine-dependent NAD(+)                      | 6.3.5.1      | <i>Thermotoga maritima</i> ATCC                                                                     | <i>Nitrospira defluvii</i> (D8PCZ9;                              |

|                              |             |                                                          |         |                                                                                                             |                                                                                                 |
|------------------------------|-------------|----------------------------------------------------------|---------|-------------------------------------------------------------------------------------------------------------|-------------------------------------------------------------------------------------------------|
| <b>0025</b>                  |             | synthetase                                               |         | 43589/MSB8 (Q9X0Y0; 576/590; 1; 47%)                                                                        | 589/590; 1; 72%)                                                                                |
| <b>NITLEN_v1_11<br/>0026</b> |             | putative methyl-accepting chemotaxis protein             |         | <i>Alcanivorax borkumensis</i> SK2/ATCC 700651 (Q0VTI9; 675/560; 0.48; 39%)                                 | <i>Pseudomonas pseudoalcaligenes</i> KF707 (L8MRJ5; 566/560; 1.02; 40%)                         |
| <b>NITLEN_v1_11<br/>0027</b> |             | putative urease accessory protein UreD                   |         | <i>Streptomyces griseus</i> JCM 4626/NBRC 13350 (B1VSW8; 293/309; 0.9; 34%)                                 | <i>Streptomyces ghanaensis</i> ATCC 14672 (D5ZRX9; 292/309; 0.89; 34%)                          |
| <b>NITLEN_v1_11<br/>0028</b> | <i>ureG</i> | Urease accessory protein UreG                            |         | <i>Alkalilimnicola ehrlichii</i> ATCC BAA-1101 (Q0AC95; 211/223; 0.84; 76%)                                 | <i>Accumulibacter phosphatis</i> UW-1 (C7RRP5; 220/223; 0.84; 77%)                              |
| <b>NITLEN_v1_11<br/>0029</b> |             | putative urease accessory protein UreF                   |         | <i>Actinobacillus pleuropneumoniae</i> ( <i>Haemophilus pleuropneumoniae</i> ) (O54423; 227/228; 0.97; 27%) | <i>Natrinema versiforme</i> JCM 10478 (L9XMX3; 254/228; 0.98; 33%)                              |
| <b>NITLEN_v1_11<br/>0030</b> | <i>ureC</i> | Urease alpha subunit                                     | 3.5.1.5 | <i>Synechococcus</i> sp. JA-2-3B'a(2-13) (Q2JQ88; 572/575; 1; 73%)                                          | <i>Chroococcidiopsis thermalis</i> PCC 7203 (K9U8V6; 572/575; 1; 75%)                           |
| <b>NITLEN_v1_11<br/>0031</b> | <i>ureB</i> | Urease beta subunit (modular protein)                    | 3.5.1.5 | <i>Deinococcus radiodurans</i> ATCC 13939 (Q9RYJ3; 228/156; 0.53; 60%)                                      | <i>Natronococcus occultus</i> SP4 (L0JZM2; 1377156; 0.81; 57%)                                  |
| <b>NITLEN_v1_11<br/>0032</b> | <i>ureA</i> | Urease gamma subunit                                     | 3.5.1.5 | <i>Azoarcus</i> sp. BH72 (A1KBB7; 100/100; 0.99; 75%)                                                       | <i>Actinomyces johnsonii</i> F0542 (U1QF59; 104/100; 0.96; 77%)                                 |
| <b>NITLEN_v1_11<br/>0033</b> |             | exported protein of unknown function                     |         | <i>Schizosaccharomyces pombe</i> 972/ATCC 24843 (O14207; 1888/142; 0.03; 32%)                               | <i>Nitrospira defluvii</i> (D8P8T7; 159/142; 0.75; 29%)                                         |
| <b>NITLEN_v1_11<br/>0034</b> | <i>urtE</i> | Urea ABC transporter, ATP-binding protein UrtE           |         | <i>Salmonella typhi</i> (P0A192; 237/236; 1; 39%)                                                           | <i>Microcoleus vaginatus</i> FGP-2 (F5UIY2; 240/236; 0.98; 57%)                                 |
| <b>NITLEN_v1_11<br/>0035</b> | <i>urtD</i> | Urea ABC transporter, ATP-binding protein UrtD           |         | <i>Escherichia coli</i> O157:H7 (P0A9S8; 255/254; 1; 35%)                                                   | <i>Desulfotomaculum carboxydivorans</i> DSM 14880 (F6B8X5; 252/254; 1; 58%)                     |
| <b>NITLEN_v1_11<br/>0036</b> |             | putative urea ABC transporter, permease protein UrtC     |         | <i>Salmonella typhimurium</i> LT2 (P30296; 425/384; 0.76; 25%)                                              | <i>Ca. Entothoonella</i> sp. TSY2 (W4LVW4; 394/384; 0.91; 59%)                                  |
| <b>NITLEN_v1_11<br/>0037</b> |             | putative urea ABC transporter, permease protein UrtB     |         | <i>Pseudomonas aeruginosa</i> ATCC 15692/PAO1 (P21627; 307/537; 0.54; 31%)                                  | <i>Curvibacter</i> putative symbiont of <i>Hydra magnipapillata</i> (C9YHE6; 496/537; 0.9; 47%) |
| <b>NITLEN_v1_11<br/>0038</b> |             | putative urea ABC transporter, urea binding protein UrtA |         | <i>Pseudomonas aeruginosa</i> ATCC 15692/PAO1 (P27017; 385/457; 0.85; 29%)                                  | <i>Cytophaga hutchinsonii</i> ATCC 33406 (Q11VN9; 445/457; 0.87; 71%)                           |

|                              |                                       |                                                             |                                                                               |
|------------------------------|---------------------------------------|-------------------------------------------------------------|-------------------------------------------------------------------------------|
| <b>NITLEN_v1_11<br/>0039</b> | conserved protein of unknown function | <i>Rattus norvegicus</i> (Q9JIL3; 897/456;<br>0.21; 25%)    | <i>Nitrospira multififormis</i> ATCC<br>25196 (Q2Y9N1; 474/456; 0.93;<br>49%) |
| <b>NITLEN_v1_11<br/>0040</b> | exported protein of unknown function  | <i>Mus musculus</i> (Q8CJ40; 2009/278; 0.09;<br>24%)        | <i>Nitrospira defluvii</i> (D8PEI4;<br>348/278; 0.9; 28%)                     |
| <b>NITLEN_v1_11<br/>0041</b> | conserved protein of unknown function | <i>Escherichia coli</i> K12 (P37177; 748/421;<br>0.23; 28%) | <i>Nitrospira defluvii</i> (D8PCZ5;<br>419/421; 0.98; 84%)                    |

<sup>a</sup> Organism with the highest BLAST e-value in the SwissProt database to the respective *N. moscoviensis* or *N. lenta* protein. In parentheses: SwissProt accession number of BLAST hit; protein length of BLAST hit / length of the homologous *N. moscoviensis* or *N. lenta* protein; alignment ratio (length of alignment / length of longer protein); amino acid identity.

<sup>b</sup> Organism with the highest BLAST e-value in the TrEMBL database to the respective *N. moscoviensis* or *N. lenta* protein. In parentheses: TrEMBL accession number of BLAST hit; protein length of BLAST hit / length of the homologous *N. moscoviensis* or *N. lenta* protein; alignment ratio (length of alignment / length of longer protein); amino acid identity.
